# Supplementary material
Source: publisher figshare collection journal article supplement (https://acs.figshare.com/ndownloader/files/5725740)
Supplement: Supplementary file 1 [file 5725740]

# ja012668z.cif

data_Cu(II)_thiosemicarbazone 
_audit_creation_date        01-12-06
_audit_creation_method CRYSTALS_ver_12-03-99
#==========================================================================
# Diffractometer details                                                   
#==========================================================================
_diffrn_measurement_device_type                                            
;                                                                          
Nonius KappaCCD                                                            
;                                                                          
_diffrn_radiation_monochromator      graphite                              
_computing_data_collection                                                 
;                                                                          
KappaCCD software 'Collect' (Nonius, 2000)                                 
;                                                                          
_computing_data_reduction                                                  
;                                                                          
KappaCCD software 'DENZO' (Otwinowski & Minor, 1996)                       
;                                                                          
_computing_cell_refinement                                                 
;                                                                          
KappaCCD software 'DENZO' (Otwinowski & Minor, 1996)                       
;                                                                          
#==========================================================================
# General computing                                                        
#==========================================================================
_computing_structure_refinement                                            
;                                                                          
CRYSTALS (Watkin et al, 2001)                                              
;                                                                          
_computing_publication_material                                            
;                                                                          
CRYSTALS (Watkin et al, 2001)                                              
;                                                                          
_computing_structure_solution 'SIR92 (Giacovazzo et al, 1992)'             
                                                                           
                                                                           
_chemical_name_systematic       # IUPAC name, in full                      
;                                                                          
?                                                                          
;                                                                          
_chemical_melting_point                    'not measured'                  
_refine_ls_matrix_type                      full                           
_atom_sites_solution_primary                direct                         
_atom_sites_solution_hydrogens              difmap                           
_refine_ls_hydrogen_treatment               refall                          
#**************************************************************************
_cell_length_a 12.3084(4)
_cell_angle_alpha 90
_cell_length_b 12.9874(5)
_cell_angle_beta  90.591(3)
_cell_length_c 8.2414(3)
_cell_angle_gamma 90
_cell_volume   1317.4
_symmetry_cell_setting 'Monoclinic ' 
_symmetry_space_group_name_H-M 'C 1 2/c 1 ' 
loop_
 _symmetry_equiv_pos_as_xyz
 'x,y,z'
 '-x,-y,-z'
 'x+1/2,y+1/2,z'
 '-x+1/2,-y+1/2,-z'
 '-x,y,-z+1/2'
 'x,-y,z+1/2'
 '-x+1/2,y+1/2,-z+1/2'
 'x+1/2,-y+1/2,z+1/2'
loop_
_atom_type_symbol
_atom_type_scat_dispersion_real
_atom_type_scat_dispersion_imag
_atom_type_scat_Cromer_Mann_a1
_atom_type_scat_Cromer_Mann_b1
_atom_type_scat_Cromer_Mann_a2
_atom_type_scat_Cromer_Mann_b2
_atom_type_scat_Cromer_Mann_a3
_atom_type_scat_Cromer_Mann_b3
_atom_type_scat_Cromer_Mann_a4
_atom_type_scat_Cromer_Mann_b4
_atom_type_scat_Cromer_Mann_c
_atom_type_scat_source  
 'C   '    0.0020    0.0020    2.3100   20.8439
    1.0200   10.2075    1.5886    0.5687    0.8650   51.6512    0.2156
'International_Tables_Vol_IV_Table_2.2B'
 'H   '    0.0000    0.0000    0.4930   10.5109
    0.3229   26.1257    0.1402    3.1424    0.0408   57.7997    0.0030
'International_Tables_Vol_IV_Table_2.2B'
 'Cu  '    0.2630    1.2660   13.3380    3.5828
    7.1676    0.2470    5.6158   11.3966    1.6735   64.8126    1.1910
'International_Tables_Vol_IV_Table_2.2B'
 'N   '    0.0040    0.0030   12.2126    0.0057
    3.1322    9.8933    2.0125   28.9975    1.1663    0.5826  -11.5290
'International_Tables_Vol_IV_Table_2.2B'
 'S   '    0.1100    0.1240    6.9053    1.4679
    5.2034   22.2151    1.4379    0.2536    1.5863   56.1720    0.8669
'International_Tables_Vol_IV_Table_2.2B'
_chemical_formula_sum
' C8 H14 Cu1 N6 S2 '
_chemical_formula_moiety
' C8 H14 Cu1 N6 S2 '
_chemical_compound_source
;
synthesis as described
;
_chemical_formula_weight   321.90
_cell_measurement_reflns_used     5344
_cell_measurement_theta_min        5
_cell_measurement_theta_max       28
_cell_measurement_temperature    150
_cell_formula_units_Z 4
_exptl_crystal_description ' block ' 
_exptl_crystal_colour ' red ' 
_exptl_crystal_size_min 0.08 
_exptl_crystal_size_mid 0.10 
_exptl_crystal_size_max 0.16 
_exptl_crystal_density_diffrn 1.623 
_exptl_crystal_density_meas 'not measured' 
_exptl_crystal_F_000 661.905 
_exptl_absorpt_coefficient_mu 1.962 
_diffrn_measurement_method \w 
_exptl_absorpt_correction_type multi-scan 
_exptl_absorpt_process_details 
; 
 Denzo/Scalepack (Otwinowski & Minor, 1996) 
; 
_exptl_absorpt_correction_T_min 0.82 
_exptl_absorpt_correction_T_max 0.85 
_diffrn_standards_interval_time 0 
_diffrn_standards_interval_count 0 
_diffrn_standards_number 0 
_diffrn_standards_decay_% 0.00 
_diffrn_ambient_temperature        150
_diffrn_reflns_number 5344 
_reflns_number_total 1576 
_diffrn_reflns_av_R_equivalents 0.03 
_diffrn_measured_fraction_theta_max 1.000 
_reflns_number_gt 1259 
_diffrn_reflns_theta_min 5.18 
_diffrn_reflns_theta_max 27.48 
_diffrn_reflns_limit_h_min -15 
_diffrn_reflns_limit_h_max 15 
_diffrn_reflns_limit_k_min -16 
_diffrn_reflns_limit_k_max 16 
_diffrn_reflns_limit_l_min -10 
_diffrn_reflns_limit_l_max 10 
_reflns_limit_h_min -15 
_reflns_limit_h_max 15 
_reflns_limit_k_min 0 
_reflns_limit_k_max 16 
_reflns_limit_l_min 0 
_reflns_limit_l_max 10 
_refine_diff_density_min -0.41 
_refine_diff_density_max 0.61 
_reflns_threshold_expression  >3.00\s(I)
_refine_ls_number_reflns 1259 
_refine_ls_number_parameters 100 
_refine_ls_R_factor_gt 0.0243 
_refine_ls_wR_factor_ref 0.0298 
_refine_ls_goodness_of_fit_ref 0.9880 
_refine_ls_shift/su_max 0.002518 
_refine_ls_structure_factor_coef F 
_refine_ls_weighting_scheme calc 
_refine_ls_weighting_details 
;
Chebychev polynomial with 3 parameters, Carruthers & Watkin , 1979, 
 1.74    0.712E-01 1.09    
;
_diffrn_radiation_type       'Mo K\a'
_diffrn_radiation_wavelength      0.71073

# Uequiv = arithmetic mean of Ui
# i.e. Ueqiv = (U1+U2+U3)/3

loop_
_atom_site_label
_atom_site_fract_x
_atom_site_fract_y
_atom_site_fract_z
_atom_site_U_iso_or_equiv
_atom_site_occupancy
_atom_site_adp_type
Cu1 0.5000 0.06993(2) 0.7500 0.0179 1.000 Uani 
S1 0.37759(4) 0.17007(3) 0.87422(6) 0.0226 1.0000 Uani 
N1 0.32792(14) -0.03263(13) 0.9358(2) 0.0222 1.0000 Uani 
N2 0.41723(13) -0.04506(12) 0.84010(19) 0.0193 1.0000 Uani 
N3 0.21670(16) 0.08915(14) 1.0431(2) 0.0279 1.0000 Uani 
C1 0.30441(16) 0.06612(15) 0.9556(2) 0.0215 1.0000 Uani 
C2 0.45153(15) -0.13645(14) 0.8018(2) 0.0205 1.0000 Uani 
C3 0.1473(2) 0.0120(2) 1.1129(3) 0.0340 1.0000 Uani 
C4 0.39670(19) -0.23306(16) 0.8558(3) 0.0286 1.0000 Uani 
H3 0.203(3) 0.151(3) 1.052(4) 0.055(4) 1.0000 Uiso 
H31 0.095(3) 0.040(3) 1.168(4) 0.055(4) 1.0000 Uiso 
H32 0.109(3) -0.027(3) 1.030(4) 0.055(4) 1.0000 Uiso 
H41 0.447(3) -0.280(3) 0.882(4) 0.055(4) 1.0000 Uiso 
H43 0.365(3) -0.225(3) 0.953(4) 0.055(4) 1.0000 Uiso 
H33 0.186(3) -0.038(3) 1.181(4) 0.055(4) 1.0000 Uiso 
H42 0.358(3) -0.256(3) 0.781(4) 0.055(4) 1.0000 Uiso 
loop_
_atom_site_aniso_label
_atom_site_aniso_U_11
_atom_site_aniso_U_22
_atom_site_aniso_U_33
_atom_site_aniso_U_23
_atom_site_aniso_U_13
_atom_site_aniso_U_12
Cu1 0.02163(18) 0.01101(16) 0.02095(17) 0.0000 0.00089(11) 0.0000 
S1 0.0236(3) 0.0147(2) 0.0296(3) 0.00017(17) 0.00452(19) 0.00152(17) 
N1 0.0231(8) 0.0179(8) 0.0257(8) -0.0004(6) 0.0012(6) -0.0008(6) 
N2 0.0203(8) 0.0146(7) 0.0229(7) 0.0007(6) -0.0035(6) 0.0001(6) 
N3 0.0274(9) 0.0219(9) 0.0347(9) -0.0006(8) 0.0076(7) -0.0008(7) 
C1 0.0210(9) 0.0207(9) 0.0228(8) 0.0010(7) -0.0029(7) -0.0012(7) 
C2 0.0235(9) 0.0150(9) 0.0229(9) 0.0010(7) -0.0062(7) -0.0012(7) 
C3 0.0267(11) 0.0364(13) 0.0388(12) 0.004(1) 0.0086(9) -0.004(1) 
C4 0.0301(11) 0.016(1) 0.0397(12) 0.0018(8) -0.0036(9) -0.0041(8) 
_refine_ls_extinction_method 
    'None'
loop_
 _geom_bond_atom_site_label_1
 _geom_bond_site_symmetry_1
 _geom_bond_atom_site_label_2
 _geom_bond_site_symmetry_2
 _geom_bond_distance
 _geom_bond_publ_flag
Cu1 . S1 . 2.2453(5)    yes
Cu1 . S1 5_656 2.2453(5)    yes
Cu1 . N2 . 1.9584(16)    yes
Cu1 . N2 5_656 1.9584(16)    yes
S1 . C1 . 1.759(2)    yes
N1 . N2 . 1.369(2)    yes
N1 . C1 . 1.325(3)    yes
N2 . C2 . 1.300(2)    yes
N3 . C1 . 1.338(3)    yes
N3 . C3 . 1.441(3)    yes
N3 . H3 . 0.83(4)    no
C2 . C2 5_656 1.474(4)    yes
C2 . C4 . 1.494(3)    yes
C3 . H31 . 0.87(4)    no
C3 . H32 . 0.97(3)    no
C3 . H33 . 0.98(4)    no
C4 . H41 . 0.90(4)    no
C4 . H43 . 0.90(4)    no
C4 . H42 . 0.83(4)    no
loop_
 _geom_angle_atom_site_label_1
 _geom_angle_site_symmetry_1
 _geom_angle_atom_site_label_2
 _geom_angle_site_symmetry_2
 _geom_angle_atom_site_label_3
 _geom_angle_site_symmetry_3
 _geom_angle
 _geom_angle_publ_flag
S1 . Cu1 . S1 5_656 109.21(3)    yes
S1 . Cu1 . N2 . 85.11(5)    yes
S1 5_656 Cu1 . N2 . 165.64(5)    yes
S1 . Cu1 . N2 5_656 165.64(5)    yes
S1 5_656 Cu1 . N2 5_656 85.11(5)    yes
N2 . Cu1 . N2 5_656 80.6(1)    yes
Cu1 . S1 . C1 . 94.46(7)    yes
N2 . N1 . C1 . 111.25(16)    yes
Cu1 . N2 . N1 . 123.53(12)    yes
Cu1 . N2 . C2 . 115.64(14)    yes
N1 . N2 . C2 . 120.82(16)    yes
C1 . N3 . C3 . 123.02(19)    yes
C1 . N3 . H3 . 115.7(25)    no
C3 . N3 . H3 . 121.2(25)    no
S1 . C1 . N1 . 125.63(16)    yes
S1 . C1 . N3 . 116.92(15)    yes
N1 . C1 . N3 . 117.44(18)    yes
N2 . C2 . C2 5_656 114.04(11)    yes
N2 . C2 . C4 . 123.06(19)    yes
C2 5_656 C2 . C4 . 122.88(12)    yes
N3 . C3 . H31 . 111.0(23)    no
N3 . C3 . H32 . 111.5(20)    no
H31 . C3 . H32 . 103.1(28)    no
N3 . C3 . H33 . 114.0(20)    no
H31 . C3 . H33 . 109.8(28)    no
H32 . C3 . H33 . 106.8(27)    no
C2 . C4 . H41 . 109.2(21)    no
C2 . C4 . H43 . 111.5(21)    no
H41 . C4 . H43 . 100.3(30)    no
C2 . C4 . H42 . 109.7(24)    no
H41 . C4 . H42 . 108.8(32)    no
H43 . C4 . H42 . 116.6(32)    no

#===END

data_Zn(II)_thiosemicarbazone 
_audit_creation_date        01-13-06
_audit_creation_method CRYSTALS_ver_12-03-99
#==========================================================================
# Diffractometer details                                                   
#==========================================================================
_diffrn_measurement_device_type                                            
;                                                                          
Nonius KappaCCD                                                            
;                                                                          
_diffrn_radiation_monochromator      graphite                              
_computing_data_collection                                                 
;                                                                          
KappaCCD software 'Collect' (Nonius, 2000)                                 
;                                                                          
_computing_data_reduction                                                  
;                                                                          
KappaCCD software 'DENZO' (Otwinowski & Minor, 1996)                       
;                                                                          
_computing_cell_refinement                                                 
;                                                                          
KappaCCD software 'DENZO' (Otwinowski & Minor, 1996)                       
;                                                                          
#==========================================================================
# General computing                                                        
#==========================================================================
_computing_structure_refinement                                            
;                                                                          
CRYSTALS (Watkin et al, 2001)                                              
;                                                                          
_computing_publication_material                                            
;                                                                          
CRYSTALS (Watkin et al, 2001)                                              
;                                                                          
_computing_structure_solution 'SIR92 (Giacovazzo et al, 1992)'             
                                                                           
                                                                           
_chemical_name_systematic       # IUPAC name, in full                      
;                                                                          
?                                                                          
;                                                                          
_chemical_melting_point                    'not measured'                  
_refine_ls_matrix_type                      full                           
_atom_sites_solution_primary                direct                         
_atom_sites_solution_hydrogens              difmap                           
# choose from 'none, undef, noref, refall, refxyz, refU, constr, mixed'    
_refine_ls_hydrogen_treatment               refall                          
#**************************************************************************
_cell_length_a 7.3522(1)
_cell_angle_alpha 99.1702(8)
_cell_length_b 9.9455(2)
_cell_angle_beta  107.5031(8)
_cell_length_c 10.0514(3)
_cell_angle_gamma 105.033(1)
_cell_volume    654.1
_symmetry_cell_setting 'Triclinic ' 
_symmetry_space_group_name_H-M 'P -1 ' 
loop_
 _symmetry_equiv_pos_as_xyz
 'x,y,z'
 '-x,-y,-z'
loop_
_atom_type_symbol
_atom_type_scat_dispersion_real
_atom_type_scat_dispersion_imag
_atom_type_scat_Cromer_Mann_a1
_atom_type_scat_Cromer_Mann_b1
_atom_type_scat_Cromer_Mann_a2
_atom_type_scat_Cromer_Mann_b2
_atom_type_scat_Cromer_Mann_a3
_atom_type_scat_Cromer_Mann_b3
_atom_type_scat_Cromer_Mann_a4
_atom_type_scat_Cromer_Mann_b4
_atom_type_scat_Cromer_Mann_c
_atom_type_scat_source  
 'C   '    0.0020    0.0020    2.3100   20.8439
    1.0200   10.2075    1.5886    0.5687    0.8650   51.6512    0.2156
'International_Tables_Vol_IV_Table_2.2B'
 'H   '    0.0000    0.0000    0.4930   10.5109
    0.3229   26.1257    0.1402    3.1424    0.0408   57.7997    0.0030
'International_Tables_Vol_IV_Table_2.2B'
 'N   '    0.0040    0.0030   12.2126    0.0057
    3.1322    9.8933    2.0125   28.9975    1.1663    0.5826  -11.5290
'International_Tables_Vol_IV_Table_2.2B'
 'S   '    0.1100    0.1240    6.9053    1.4679
    5.2034   22.2151    1.4379    0.2536    1.5863   56.1720    0.8669
'International_Tables_Vol_IV_Table_2.2B'
 'Zn  '    0.2220    1.4310   14.0743    3.2655
    7.0318    0.2333    5.1652   10.3163    2.4100   58.7097    1.3041
'International_Tables_Vol_IV_Table_2.2B'
_chemical_formula_sum
' C8 H14 N6 S2 Zn1 '
_chemical_formula_moiety
' C8 H14 N6 S2 Zn1 '
_chemical_compound_source
;
synthesis as described
;
_chemical_formula_weight   323.74
_cell_measurement_reflns_used    45757
_cell_measurement_theta_min        5
_cell_measurement_theta_max       28
_cell_measurement_temperature    150
_cell_formula_units_Z 2
_exptl_crystal_description ' block ' 
_exptl_crystal_colour ' yellow ' 
_exptl_crystal_size_min 0.06 
_exptl_crystal_size_mid 0.12 
_exptl_crystal_size_max 0.20 
_exptl_crystal_density_diffrn 1.644 
_exptl_crystal_density_meas 'not measured' 
_exptl_crystal_F_000 332.873 
_exptl_absorpt_coefficient_mu 2.184 
_diffrn_measurement_method \w 
_exptl_absorpt_correction_type multi-scan 
_exptl_absorpt_process_details 
; 
 Denzo/Scalepack (Otwinowski & Minor, 1996) 
; 
_exptl_absorpt_correction_T_min 0.77 
_exptl_absorpt_correction_T_max 0.88 
_diffrn_standards_interval_time 0 
_diffrn_standards_interval_count 0 
_diffrn_standards_number 0 
_diffrn_standards_decay_% 0.00 
_diffrn_ambient_temperature        150
_diffrn_reflns_number 11099 
_reflns_number_total 2956 
_diffrn_reflns_av_R_equivalents 0.026
# Number of reflections with Friedels Law is 2956 
# Number of reflections without Friedels Law is 0 
# Theoretical number of reflections is about 2997 
_diffrn_measured_fraction_theta_max 0.986 
_reflns_number_gt 2697 
_diffrn_reflns_theta_min 5.36 
_diffrn_reflns_theta_max 27.47 
_diffrn_reflns_limit_h_min -9 
_diffrn_reflns_limit_h_max 9 
_diffrn_reflns_limit_k_min -12 
_diffrn_reflns_limit_k_max 12 
_diffrn_reflns_limit_l_min -12
_diffrn_reflns_limit_l_max 12 
_reflns_limit_h_min -9 
_reflns_limit_h_max 8 
_reflns_limit_k_min -12 
_reflns_limit_k_max 12 
_reflns_limit_l_min 0 
_reflns_limit_l_max 12 
_refine_diff_density_min -0.30 
_refine_diff_density_max 0.35 
_reflns_threshold_expression  >3.00\s(I)
_refine_ls_number_reflns 2697 
_refine_ls_number_parameters 197 
_refine_ls_R_factor_gt 0.0207 
_refine_ls_wR_factor_ref 0.0243 
_refine_ls_goodness_of_fit_ref 1.0068 
_refine_ls_shift/su_max 0.004714 
_refine_ls_structure_factor_coef F 
_refine_ls_weighting_scheme calc 
_refine_ls_weighting_details 
;
Chebychev polynomial with 3 parameters, Carruthers & Watkin , 1979, 
 1.80    -.147     1.03    
;
_diffrn_radiation_type       'Mo K\a'
_diffrn_radiation_wavelength      0.71073

# Uequiv = arithmetic mean of Ui
# i.e. Ueqiv = (U1+U2+U3)/3

loop_
_atom_site_label
_atom_site_fract_x
_atom_site_fract_y
_atom_site_fract_z
_atom_site_U_iso_or_equiv
_atom_site_occupancy
_atom_site_adp_type
Zn1 0.44357(2) 0.630202(16) 0.436606(16) 0.0141 1.0000 Uani 
S1 0.73672(5) 0.55433(4) 0.46926(4) 0.0145 1.0000 Uani 
S2 0.26063(5) 0.59842(4) 0.19383(4) 0.0175 1.0000 Uani 
N1 0.82815(19) 0.77728(13) 0.70872(13) 0.0175 1.0000 Uani 
N2 0.64318(19) 0.78292(13) 0.62932(13) 0.0162 1.0000 Uani 
N3 1.06231(19) 0.66553(14) 0.70484(14) 0.0189 1.0000 Uani 
N4 0.12874(19) 0.77691(13) 0.35636(13) 0.0173 1.0000 Uani 
N5 0.30468(19) 0.78595(13) 0.46018(13) 0.0160 1.0000 Uani 
N6 -0.0769(2) 0.66119(16) 0.12365(15) 0.0230 1.0000 Uani 
C1 0.8813(2) 0.67850(15) 0.64126(15) 0.0158 1.0000 Uani 
C2 0.5753(2) 0.87955(15) 0.68049(15) 0.0161 1.0000 Uani 
C3 1.1917(3) 0.7441(2) 0.85179(18) 0.0257 1.0000 Uani 
C4 0.6843(3) 0.98230(18) 0.82696(17) 0.0226 1.0000 Uani 
C5 0.0955(2) 0.68557(15) 0.23313(15) 0.0165 1.0000 Uani 
C6 0.3813(2) 0.88359(15) 0.58174(15) 0.0162 1.0000 Uani 
C7 -0.2279(3) 0.7273(2) 0.1354(2) 0.0328 1.0000 Uani 
C8 0.2870(3) 0.99371(17) 0.61853(18) 0.0218 1.0000 Uani 
H3 1.090(4) 0.600(3) 0.660(3) 0.056(2) 1.0000 Uiso 
H6 -0.097(4) 0.602(3) 0.045(3) 0.056(2) 1.0000 Uiso 
H31 1.308(4) 0.717(3) 0.872(3) 0.056(2) 1.0000 Uiso 
H32 1.230(4) 0.845(3) 0.859(3) 0.056(2) 1.0000 Uiso 
H33 1.131(4) 0.724(3) 0.915(3) 0.056(2) 1.0000 Uiso 
H41 0.817(5) 1.028(3) 0.839(3) 0.056(2) 1.0000 Uiso 
H42 0.707(4) 0.939(3) 0.893(3) 0.056(2) 1.0000 Uiso 
H43 0.642(4) 1.060(3) 0.835(3) 0.056(2) 1.0000 Uiso 
H71 -0.333(4) 0.690(3) 0.054(3) 0.056(2) 1.0000 Uiso 
H72 -0.174(4) 0.831(3) 0.156(3) 0.056(2) 1.0000 Uiso 
H73 -0.265(4) 0.713(3) 0.218(3) 0.056(2) 1.0000 Uiso 
H81 0.383(4) 1.082(3) 0.678(3) 0.056(2) 1.0000 Uiso 
H82 0.200(4) 0.961(3) 0.662(3) 0.056(2) 1.0000 Uiso 
H83 0.223(4) 1.017(3) 0.538(3) 0.056(2) 1.0000 Uiso 
loop_
_atom_site_aniso_label
_atom_site_aniso_U_11
_atom_site_aniso_U_22
_atom_site_aniso_U_33
_atom_site_aniso_U_23
_atom_site_aniso_U_13
_atom_site_aniso_U_12
Zn1 0.01588(9) 0.01229(9) 0.01280(9) 0.00070(6) 0.00326(6) 0.00610(6) 
S1 0.01417(15) 0.01564(16) 0.01356(16) 0.00148(12) 0.00520(12) 0.00583(12) 
S2 0.01854(17) 0.02159(18) 0.01273(16) 0.00157(13) 0.00425(12) 0.01050(14) 
N1 0.0169(6) 0.0165(6) 0.0157(6) 0.0014(4) 0.0035(5) 0.0045(5) 
N2 0.0169(6) 0.0137(5) 0.0160(6) 0.0016(4) 0.0046(5) 0.0044(4) 
N3 0.0144(6) 0.0218(6) 0.0176(6) 0.0022(5) 0.0037(5) 0.0055(5) 
N4 0.0185(6) 0.0175(6) 0.0166(6) 0.0037(5) 0.0056(5) 0.0083(5) 
N5 0.0189(6) 0.0149(5) 0.0154(6) 0.0037(4) 0.0065(5) 0.0072(5) 
N6 0.0220(6) 0.0287(7) 0.0178(6) 0.0011(5) 0.0039(5) 0.0139(6) 
C1 0.0153(6) 0.0155(6) 0.0144(6) 0.0034(5) 0.0052(5) 0.0020(5) 
C2 0.0202(7) 0.0129(6) 0.0148(6) 0.0019(5) 0.0083(5) 0.0033(5) 
C3 0.0186(7) 0.0311(9) 0.0194(7) 0.0037(6) 0.0006(6) 0.0040(6) 
C4 0.0264(8) 0.0174(7) 0.0180(7) -0.0032(6) 0.0049(6) 0.0055(6) 
C5 0.0173(6) 0.0178(6) 0.0162(6) 0.0059(5) 0.0061(5) 0.0077(5) 
C6 0.0208(7) 0.0134(6) 0.0175(7) 0.0037(5) 0.0105(5) 0.0064(5) 
C7 0.0257(8) 0.0486(11) 0.0266(9) 0.0047(8) 0.0051(7) 0.0241(8) 
C8 0.0267(8) 0.0185(7) 0.0234(8) 0.0019(6) 0.0121(6) 0.0109(6) 
_refine_ls_extinction_method 
    'None'
loop_
 _geom_bond_atom_site_label_1
 _geom_bond_site_symmetry_1
 _geom_bond_atom_site_label_2
 _geom_bond_site_symmetry_2
 _geom_bond_distance
 _geom_bond_publ_flag
Zn1 . Zn1 2_666 3.2481(3)    yes
Zn1 . S1 . 2.4123(4)    yes
Zn1 . S1 2_666 2.4630(4)    yes
Zn1 . S2 . 2.3287(4)    yes
Zn1 . N2 . 2.0997(12)    yes
Zn1 . N5 . 2.0851(12)    yes
S1 . C1 . 1.7824(14)    yes
S2 . C5 . 1.7627(15)    yes
N1 . N2 . 1.3749(17)    yes
N1 . C1 . 1.3131(19)    yes
N2 . C2 . 1.2972(19)    yes
N3 . C1 . 1.3415(19)    yes
N3 . C3 . 1.449(2)    yes
N3 . H3 . 0.83(3)    no
N4 . N5 . 1.3668(17)    yes
N4 . C5 . 1.3278(19)    yes
N5 . C6 . 1.2950(19)    yes
N6 . C5 . 1.339(2)    yes
N6 . C7 . 1.452(2)    yes
N6 . H6 . 0.85(3)    no
C2 . C4 . 1.497(2)    yes
C2 . C6 . 1.487(2)    yes
C3 . H31 . 0.94(3)    no
C3 . H32 . 0.96(3)    no
C3 . H33 . 0.89(3)    no
C4 . H41 . 0.93(3)    no
C4 . H42 . 0.84(3)    no
C4 . H43 . 0.90(3)    no
C6 . C8 . 1.495(2)    yes
C7 . H71 . 0.88(3)    no
C7 . H72 . 0.97(3)    no
C7 . H73 . 0.96(3)    no
C8 . H81 . 0.94(3)    no
C8 . H82 . 0.90(3)    no
C8 . H83 . 0.90(3)    no
loop_
 _geom_angle_atom_site_label_1
 _geom_angle_site_symmetry_1
 _geom_angle_atom_site_label_2
 _geom_angle_site_symmetry_2
 _geom_angle_atom_site_label_3
 _geom_angle_site_symmetry_3
 _geom_angle
 _geom_angle_publ_flag
Zn1 2_666 Zn1 . S1 . 48.893(9)    yes
Zn1 2_666 Zn1 . S1 2_666 47.558(9)    yes
S1 . Zn1 . S1 2_666 96.452(12)    yes
Zn1 2_666 Zn1 . S2 . 122.474(12)    yes
S1 . Zn1 . S2 . 112.063(13)    yes
S1 2_666 Zn1 . S2 . 109.887(13)    yes
Zn1 2_666 Zn1 . N2 . 91.20(3)    yes
S1 . Zn1 . N2 . 80.41(4)    yes
S1 2_666 Zn1 . N2 . 101.00(3)    yes
S2 . Zn1 . N2 . 144.52(4)    yes
Zn1 2_666 Zn1 . N5 . 143.74(3)    yes
S1 . Zn1 . N5 . 152.54(4)    yes
S1 2_666 Zn1 . N5 . 101.20(3)    yes
S2 . Zn1 . N5 . 81.43(3)    yes
N2 . Zn1 . N5 . 75.71(5)    yes
Zn1 . S1 . Zn1 2_666 83.548(12)    yes
Zn1 . S1 . C1 . 94.84(5)    yes
Zn1 2_666 S1 . C1 . 95.27(5)    yes
Zn1 . S2 . C5 . 93.13(5)    yes
N2 . N1 . C1 . 112.82(12)    yes
Zn1 . N2 . N1 . 124.18(9)    yes
Zn1 . N2 . C2 . 116.1(1)    yes
N1 . N2 . C2 . 119.43(12)    yes
C1 . N3 . C3 . 122.64(14)    yes
C1 . N3 . H3 . 116.3(20)    no
C3 . N3 . H3 . 120.4(20)    no
N5 . N4 . C5 . 111.08(12)    yes
Zn1 . N5 . N4 . 120.89(9)    yes
Zn1 . N5 . C6 . 117.5(1)    yes
N4 . N5 . C6 . 121.35(12)    yes
C5 . N6 . C7 . 123.07(14)    yes
C5 . N6 . H6 . 116.8(20)    no
C7 . N6 . H6 . 120.1(20)    no
S1 . C1 . N1 . 126.94(11)    yes
S1 . C1 . N3 . 114.28(11)    yes
N1 . C1 . N3 . 118.78(13)    yes
N2 . C2 . C4 . 123.09(14)    yes
N2 . C2 . C6 . 115.18(12)    yes
C4 . C2 . C6 . 121.72(13)    yes
N3 . C3 . H31 . 106.9(17)    no
N3 . C3 . H32 . 109.7(17)    no
H31 . C3 . H32 . 108.5(23)    no
N3 . C3 . H33 . 111.6(18)    no
H31 . C3 . H33 . 110.4(24)    no
H32 . C3 . H33 . 109.7(24)    no
C2 . C4 . H41 . 110.5(18)    no
C2 . C4 . H42 . 111.8(20)    no
H41 . C4 . H42 . 97.9(26)    no
C2 . C4 . H43 . 111.8(18)    no
H41 . C4 . H43 . 99.0(24)    no
H42 . C4 . H43 . 123.3(26)    no
S2 . C5 . N4 . 126.91(11)    yes
S2 . C5 . N6 . 115.58(11)    yes
N4 . C5 . N6 . 117.42(13)    yes
N5 . C6 . C2 . 114.08(12)    yes
N5 . C6 . C8 . 123.22(14)    yes
C2 . C6 . C8 . 122.68(13)    yes
N6 . C7 . H71 . 107.4(19)    no
N6 . C7 . H72 . 111.2(17)    no
H71 . C7 . H72 . 112.1(25)    no
N6 . C7 . H73 . 111.5(17)    no
H71 . C7 . H73 . 111.9(25)    no
H72 . C7 . H73 . 102.8(23)    no
C6 . C8 . H81 . 112.4(17)    no
C6 . C8 . H82 . 111.1(18)    no
H81 . C8 . H82 . 109.4(24)    no
C6 . C8 . H83 . 110.4(18)    no
H81 . C8 . H83 . 103.6(25)    no
H82 . C8 . H83 . 109.7(25)    no

#===END

data_Cu(I)_thiosemicarbazone_dimer 
_audit_creation_date        01-12-06
_audit_creation_method CRYSTALS_ver_12-03-99
#==========================================================================
# Diffractometer details                                                   
#==========================================================================
_diffrn_measurement_device_type                                            
;                                                                          
Nonius KappaCCD                                                            
;                                                                          
_diffrn_radiation_monochromator      graphite                              
_computing_data_collection                                                 
;                                                                          
KappaCCD software 'Collect' (Nonius, 2000)                                 
;                                                                          
_computing_data_reduction                                                  
;                                                                          
KappaCCD software 'DENZO' (Otwinowski & Minor, 1996)                       
;                                                                          
_computing_cell_refinement                                                 
;                                                                          
KappaCCD software 'DENZO' (Otwinowski & Minor, 1996)                       
;                                                                          
#==========================================================================
# General computing                                                        
#==========================================================================
_computing_structure_refinement                                            
;                                                                          
CRYSTALS (Watkin et al, 2001)                                              
;                                                                          
_computing_publication_material                                            
;                                                                          
CRYSTALS (Watkin et al, 2001)                                              
;                                                                          
_computing_structure_solution 'SIR92 (Giacovazzo et al, 1992)'             
                                                                           
                                                                           
_chemical_name_systematic       # IUPAC name, in full                      
;                                                                          
?                                                                          
;                                                                          
_chemical_melting_point                    'not measured'                  
_refine_ls_matrix_type                      full                           
_atom_sites_solution_primary                direct                         
_atom_sites_solution_hydrogens              geom                           
_refine_ls_hydrogen_treatment               mixed                          
#**************************************************************************
_cell_length_a 17.9984(3)
_cell_angle_alpha 90
_cell_length_b 26.7127(5)
_cell_angle_beta  114.0639(5)
_cell_length_c 11.7729(2)
_cell_angle_gamma 90
_cell_volume   5168.3
_symmetry_cell_setting 'Monoclinic ' 
_symmetry_space_group_name_H-M 'C 1 2/c 1 ' 
loop_
 _symmetry_equiv_pos_as_xyz
 'x,y,z'
 '-x,-y,-z'
 'x+1/2,y+1/2,z'
 '-x+1/2,-y+1/2,-z'
 '-x,y,-z+1/2'
 'x,-y,z+1/2'
 '-x+1/2,y+1/2,-z+1/2'
 'x+1/2,-y+1/2,z+1/2'
loop_
_atom_type_symbol
_atom_type_scat_dispersion_real
_atom_type_scat_dispersion_imag
_atom_type_scat_Cromer_Mann_a1
_atom_type_scat_Cromer_Mann_b1
_atom_type_scat_Cromer_Mann_a2
_atom_type_scat_Cromer_Mann_b2
_atom_type_scat_Cromer_Mann_a3
_atom_type_scat_Cromer_Mann_b3
_atom_type_scat_Cromer_Mann_a4
_atom_type_scat_Cromer_Mann_b4
_atom_type_scat_Cromer_Mann_c
_atom_type_scat_source  
 'C   '    0.0020    0.0020    2.3100   20.8439
    1.0200   10.2075    1.5886    0.5687    0.8650   51.6512    0.2156
'International_Tables_Vol_IV_Table_2.2B'
 'H   '    0.0000    0.0000    0.4930   10.5109
    0.3229   26.1257    0.1402    3.1424    0.0408   57.7997    0.0030
'International_Tables_Vol_IV_Table_2.2B'
 'Cu  '    0.2630    1.2660   13.3380    3.5828
    7.1676    0.2470    5.6158   11.3966    1.6735   64.8126    1.1910
'International_Tables_Vol_IV_Table_2.2B'
 'F   '    0.0140    0.0100    3.5392   10.2825
    2.6412    4.2944    1.5170    0.2615    1.0243   26.1476    0.2776
'International_Tables_Vol_IV_Table_2.2B'
 'N   '    0.0040    0.0030   12.2126    0.0057
    3.1322    9.8933    2.0125   28.9975    1.1663    0.5826  -11.5290
'International_Tables_Vol_IV_Table_2.2B'
 'O   '    0.0080    0.0060    3.0485   13.2771
    2.2868    5.7011    1.5463    0.3239    0.8670   32.9089    0.2508
'International_Tables_Vol_IV_Table_2.2B'
 'P   '    0.0900    0.0950    6.4345    1.9067
    4.1791   27.1570    1.7800    0.5260    1.4908   68.1645    1.1149
'International_Tables_Vol_IV_Table_2.2B'
 'S   '    0.1100    0.1240    6.9053    1.4679
    5.2034   22.2151    1.4379    0.2536    1.5863   56.1720    0.8669
'International_Tables_Vol_IV_Table_2.2B'
_chemical_formula_sum
' C14 H30 Cu1 F6 N8 O2 P1 S2 '
_chemical_formula_moiety
' C14 H30 Cu1 F6 N8 O2 P1 S2 '
_chemical_compound_source
;
?
;
_chemical_formula_weight   615.07
_cell_measurement_reflns_used    45757
_cell_measurement_theta_min        5
_cell_measurement_theta_max       28
_cell_measurement_temperature    150
_cell_formula_units_Z 8
_exptl_crystal_description ' block ' 
_exptl_crystal_colour ' red ' 
_exptl_crystal_size_min 0.12 
_exptl_crystal_size_mid 0.12 
_exptl_crystal_size_max 0.22 
_exptl_crystal_density_diffrn 1.581 
_exptl_crystal_density_meas 'not measured' 
_exptl_crystal_F_000 2533.290 
_exptl_absorpt_coefficient_mu 1.140 
_diffrn_measurement_method \w 
_exptl_absorpt_correction_type multi-scan 
_exptl_absorpt_process_details 
; 
 Denzo/Scalepack (Otwinowski & Minor, 1996) 
; 
_exptl_absorpt_correction_T_min 0.78 
_exptl_absorpt_correction_T_max 0.87 
_diffrn_standards_interval_time 0 
_diffrn_standards_interval_count 0 
_diffrn_standards_number 0 
_diffrn_standards_decay_% 0.00 
_diffrn_ambient_temperature        150
_diffrn_reflns_number 32064 
_reflns_number_total 5977 
_diffrn_reflns_av_R_equivalents 0.047 
_diffrn_measured_fraction_theta_max 0.998 
_reflns_number_gt 3571 
_diffrn_reflns_theta_min 5.10 
_diffrn_reflns_theta_max 27.48 
_diffrn_reflns_limit_h_min -23 
_diffrn_reflns_limit_h_max 23 
_diffrn_reflns_limit_k_min -34 
_diffrn_reflns_limit_k_max 34 
_diffrn_reflns_limit_l_min -15 
_diffrn_reflns_limit_l_max 15 
_reflns_limit_h_min -23 
_reflns_limit_h_max 21 
_reflns_limit_k_min 0 
_reflns_limit_k_max 34 
_reflns_limit_l_min 0 
_reflns_limit_l_max 15 
_refine_diff_density_min -0.50 
_refine_diff_density_max 0.52 
_reflns_threshold_expression  >3.00\s(I)
_refine_ls_number_reflns 3571 
_refine_ls_number_parameters 323 
_refine_ls_R_factor_gt 0.0368 
_refine_ls_wR_factor_ref 0.0423 
_refine_ls_goodness_of_fit_ref 1.0428 
_refine_ls_shift/su_max 0.001054 
_refine_ls_structure_factor_coef F 
_refine_ls_weighting_scheme calc 
_refine_ls_weighting_details 
;
Chebychev polynomial with 3 parameters, Carruthers & Watkin , 1979, 
0.497    0.280    0.219    
;
_diffrn_radiation_type       'Mo K\a'
_diffrn_radiation_wavelength      0.71073

# Uequiv = arithmetic mean of Ui
# i.e. Ueqiv = (U1+U2+U3)/3

loop_
_atom_site_label
_atom_site_fract_x
_atom_site_fract_y
_atom_site_fract_z
_atom_site_U_iso_or_equiv
_atom_site_occupancy
_atom_site_adp_type
Cu1 0.57392(2) 0.118472(14) 0.68548(4) 0.0262 1.0000 Uani 
S1 0.69822(5) 0.09286(3) 0.82261(7) 0.0290 1.0000 Uani 
S2 0.51698(5) 0.14711(3) 0.48648(7) 0.0283 1.0000 Uani 
P1 0.41858(5) 0.36240(4) 0.9673(1) 0.0402 1.0000 Uani 
F1 0.40666(15) 0.33951(9) 0.8354(2) 0.0509 1.0000 Uani 
F2 0.32423(15) 0.37576(14) 0.9110(4) 0.0989 1.0000 Uani 
F3 0.43743(19) 0.4158(1) 0.9283(4) 0.1021 1.0000 Uani 
F4 0.43083(17) 0.38324(14) 1.1001(3) 0.0936 1.0000 Uani 
F5 0.51199(13) 0.34951(9) 1.0216(2) 0.0505 1.0000 Uani 
F6 0.3988(2) 0.30886(12) 1.0060(2) 0.0802 1.0000 Uani 
O1 0.73977(14) 0.22858(9) 1.1440(2) 0.0364 1.0000 Uani 
O2 0.28492(15) 0.0276(1) 0.3189(2) 0.0425 1.0000 Uani 
N1 0.65667(15) 0.1735(1) 0.9202(2) 0.0246 1.0000 Uani 
N2 0.58460(14) 0.17540(9) 0.8158(2) 0.0219 1.0000 Uani 
N3 0.77733(16) 0.13771(11) 1.0408(3) 0.0297 1.0000 Uani 
N4 0.48159(15) 0.06355(9) 0.6243(2) 0.0231 1.0000 Uani 
N5 0.43004(17) 0.0674(1) 0.5001(2) 0.0257 1.0000 Uani 
N6 0.37618(18) 0.11223(11) 0.3217(2) 0.0286 1.0000 Uani 
N7 0.73872(16) 0.2809(1) 1.2961(2) 0.0282 1.0000 Uani 
N8 0.17300(19) -0.02042(12) 0.2734(3) 0.0407 1.0000 Uani 
C1 0.71184(18) 0.13648(11) 0.9343(3) 0.0234 1.0000 Uani 
C2 0.53998(18) 0.21452(11) 0.8037(3) 0.0230 1.0000 Uani 
C3 0.8451(2) 0.10283(13) 1.0727(3) 0.0358 1.0000 Uani 
C4 0.5629(2) 0.25840(12) 0.8902(3) 0.0336 1.0000 Uani 
C5 0.43670(18) 0.10773(11) 0.4334(3) 0.0241 1.0000 Uani 
C6 0.47439(19) 0.02390(11) 0.6822(3) 0.0252 1.0000 Uani 
C7 0.3709(2) 0.15168(13) 0.2340(3) 0.0349 1.0000 Uani 
C8 0.4189(2) -0.01927(12) 0.6240(3) 0.0353 1.0000 Uani 
C9 0.77250(19) 0.24733(12) 1.2493(3) 0.0298 1.0000 Uani 
C10 0.6583(2) 0.30139(15) 1.2230(4) 0.0449 1.0000 Uani 
C11 0.7831(2) 0.30172(13) 1.4194(3) 0.0343 1.0000 Uani 
C12 0.2160(2) 0.01358(13) 0.2475(3) 0.0342 1.0000 Uani 
C13 0.0936(3) -0.03602(18) 0.1835(5) 0.0597 1.0000 Uani 
C14 0.2079(4) -0.0464(2) 0.3917(5) 0.0956 1.0000 Uani 
H1 0.668(2) 0.1931(14) 0.974(4) 0.03(1) 1.0000 Uiso 
H3 0.780(2) 0.1589(15) 1.088(4) 0.036(11) 1.0000 Uiso 
H5 0.389(2) 0.0500(15) 0.470(4) 0.037(11) 1.0000 Uiso 
H6 0.342(2) 0.0911(14) 0.301(3) 0.024(9) 1.0000 Uiso 
H31 0.8873 0.1110 1.1573 0.0417 1.0000 Uiso 
H32 0.8694 0.1057 1.0102 0.0417 1.0000 Uiso 
H33 0.8250 0.0679 1.0724 0.0417 1.0000 Uiso 
H41 0.5181 0.2837 0.8606 0.0378 1.0000 Uiso 
H42 0.6141 0.2738 0.8922 0.0378 1.0000 Uiso 
H43 0.5719 0.2470 0.9757 0.0378 1.0000 Uiso 
H71 0.3201 0.1473 0.1566 0.0431 1.0000 Uiso 
H72 0.4193 0.1500 0.2128 0.0431 1.0000 Uiso 
H73 0.3697 0.1850 0.2720 0.0431 1.0000 Uiso 
H81 0.4251 -0.0450 0.6891 0.0419 1.0000 Uiso 
H82 0.4332 -0.0345 0.5580 0.0419 1.0000 Uiso 
H83 0.3613 -0.0072 0.5861 0.0419 1.0000 Uiso 
H91 0.8290 0.2362 1.3033 0.0351 1.0000 Uiso 
H101 0.6342 0.2841 1.1406 0.0504 1.0000 Uiso 
H102 0.6630 0.3380 1.2099 0.0504 1.0000 Uiso 
H103 0.6225 0.2961 1.2682 0.0504 1.0000 Uiso 
H111 0.8370 0.2847 1.4599 0.0403 1.0000 Uiso 
H112 0.7916 0.3384 1.4124 0.0403 1.0000 Uiso 
H113 0.7511 0.2965 1.4708 0.0403 1.0000 Uiso 
H121 0.1913 0.0295 0.1634 0.0409 1.0000 Uiso 
H131 0.0775 -0.0149 0.1069 0.0707 1.0000 Uiso 
H132 0.0959 -0.0720 0.1614 0.0707 1.0000 Uiso 
H133 0.0527 -0.0319 0.2202 0.0707 1.0000 Uiso 
H141 0.2623 -0.0317 0.4437 0.1108 1.0000 Uiso 
H142 0.2142 -0.0827 0.3770 0.1108 1.0000 Uiso 
H143 0.1711 -0.0426 0.4359 0.1108 1.0000 Uiso 
loop_
_atom_site_aniso_label
_atom_site_aniso_U_11
_atom_site_aniso_U_22
_atom_site_aniso_U_33
_atom_site_aniso_U_23
_atom_site_aniso_U_13
_atom_site_aniso_U_12
Cu1 0.02721(19) 0.02642(19) 0.02551(19) -0.00359(16) 0.01141(15) -0.00320(16) 
S1 0.0277(4) 0.0280(4) 0.0326(4) -0.0059(3) 0.0138(3) 0.0034(3) 
S2 0.0318(4) 0.0301(4) 0.0259(4) -0.0016(3) 0.0149(3) -0.0084(3) 
P1 0.0254(4) 0.0416(5) 0.0509(6) -0.0168(4) 0.0129(4) -0.0027(4) 
F1 0.0552(14) 0.0607(15) 0.0353(11) -0.003(1) 0.017(1) -0.0043(11) 
F2 0.0257(13) 0.116(3) 0.135(3) -0.056(2) 0.0121(15) 0.0021(15) 
F3 0.0656(18) 0.0351(13) 0.142(3) 0.0136(17) -0.0224(19) -0.0085(13) 
F4 0.0571(17) 0.137(3) 0.088(2) -0.074(2) 0.0305(16) -0.0084(18) 
F5 0.0312(11) 0.0587(14) 0.0541(14) -0.0056(11) 0.010(1) 0.010(1) 
F6 0.103(2) 0.085(2) 0.0499(15) -0.0058(14) 0.0284(15) -0.0493(18) 
O1 0.0382(13) 0.0396(13) 0.0267(12) -0.006(1) 0.008(1) 0.007(1) 
O2 0.0379(14) 0.0425(14) 0.0404(14) -0.0019(12) 0.0093(12) -0.0151(11) 
N1 0.0231(13) 0.0257(13) 0.0230(13) -0.0045(11) 0.0073(11) 0.001(1) 
N2 0.0208(12) 0.0232(12) 0.0219(12) 0.001(1) 0.009(1) -0.002(1) 
N3 0.0264(14) 0.0319(15) 0.0289(15) -0.0033(12) 0.0096(12) 0.0057(11) 
N4 0.0267(13) 0.0227(12) 0.0223(12) -0.001(1) 0.013(1) -0.001(1) 
N5 0.0288(14) 0.0265(13) 0.0228(13) -0.0026(11) 0.0114(11) -0.0068(11) 
N6 0.0320(14) 0.0311(15) 0.0244(13) 0.0004(12) 0.0135(12) -0.0074(13) 
N7 0.0268(13) 0.0300(14) 0.0243(13) -0.0031(11) 0.0068(11) 0.0010(11) 
N8 0.0433(17) 0.0404(17) 0.0433(17) -0.0133(14) 0.0228(15) -0.0184(14) 
C1 0.0250(15) 0.0239(14) 0.0246(14) 0.0012(12) 0.0135(12) -0.0002(11) 
C2 0.0261(15) 0.0213(14) 0.0241(14) 0.0009(12) 0.0127(13) 0.0004(12) 
C3 0.0290(17) 0.0393(18) 0.0359(18) -0.0009(15) 0.0101(14) 0.0114(14) 
C4 0.0347(18) 0.0260(16) 0.0339(18) -0.0072(14) 0.0078(15) 0.0018(14) 
C5 0.0272(15) 0.0265(15) 0.0243(14) -0.0018(12) 0.0164(13) -0.0016(12) 
C6 0.0283(16) 0.0203(14) 0.0298(16) -0.0031(12) 0.0147(13) -0.0004(12) 
C7 0.0381(18) 0.0402(19) 0.0294(17) 0.0074(15) 0.0169(15) -0.0037(15) 
C8 0.047(2) 0.0255(16) 0.0324(17) -0.0001(14) 0.0149(16) -0.0066(14) 
C9 0.0287(16) 0.0316(16) 0.0274(16) 0.0013(13) 0.0097(14) 0.0035(13) 
C10 0.0345(19) 0.048(2) 0.043(2) -0.0096(18) 0.0071(16) 0.0119(17) 
C11 0.0388(19) 0.0367(18) 0.0252(16) -0.0068(14) 0.0107(14) -0.0076(15) 
C12 0.0299(17) 0.0351(18) 0.0371(18) -0.0045(15) 0.0132(15) -0.0031(14) 
C13 0.037(2) 0.064(3) 0.076(3) -0.017(2) 0.021(2) -0.017(2) 
C14 0.120(5) 0.107(5) 0.050(3) 0.004(3) 0.025(3) -0.078(4) 
_refine_ls_extinction_method 
    'None'
loop_
 _geom_bond_atom_site_label_1
 _geom_bond_site_symmetry_1
 _geom_bond_atom_site_label_2
 _geom_bond_site_symmetry_2
 _geom_bond_distance
 _geom_bond_publ_flag
Cu1 . S1 . 2.2658(9)    yes
Cu1 . S2 . 2.2729(9)    yes
Cu1 . N2 . 2.112(2)    yes
Cu1 . N4 . 2.111(2)    yes
S1 . C1 . 1.698(3)    yes
S2 . C5 . 1.688(3)    yes
P1 . F1 . 1.600(2)    yes
P1 . F2 . 1.591(3)    yes
P1 . F3 . 1.576(3)    yes
P1 . F4 . 1.588(3)    yes
P1 . F5 . 1.574(2)    yes
P1 . F6 . 1.584(3)    yes
O1 . C9 . 1.241(4)    yes
O2 . C12 . 1.239(4)    yes
N1 . N2 . 1.377(4)    yes
N1 . C1 . 1.363(4)    yes
N1 . H1 . 0.78(4)    no
N2 . C2 . 1.290(4)    yes
N3 . C1 . 1.326(4)    yes
N3 . C3 . 1.457(4)    yes
N3 . H3 . 0.78(4)    no
N4 . N5 . 1.380(4)    yes
N4 . C6 . 1.294(4)    yes
N5 . C5 . 1.366(4)    yes
N5 . H5 . 0.83(4)    no
N6 . C5 . 1.327(4)    yes
N6 . C7 . 1.452(4)    yes
N6 . H6 . 0.79(4)    no
N7 . C9 . 1.323(4)    yes
N7 . C10 . 1.456(4)    yes
N7 . C11 . 1.452(4)    yes
N8 . C12 . 1.307(4)    yes
N8 . C13 . 1.450(5)    yes
N8 . C14 . 1.450(6)    yes
C2 . C2 5_656 1.478(6)    yes
C2 . C4 . 1.497(4)    yes
C3 . H31 . 1.000       no
C3 . H32 . 1.000       no
C3 . H33 . 1.000       no
C4 . H41 . 1.000       no
C4 . H42 . 1.000       no
C4 . H43 . 1.000       no
C6 . C6 5_656 1.483(6)    yes
C6 . C8 . 1.496(4)    yes
C7 . H71 . 1.000       no
C7 . H72 . 1.000       no
C7 . H73 . 1.000       no
C8 . H81 . 1.000       no
C8 . H82 . 1.000       no
C8 . H83 . 1.000       no
C9 . H91 . 1.000       no
C10 . H101 . 1.000       no
C10 . H102 . 1.000       no
C10 . H103 . 1.000       no
C11 . H111 . 1.000       no
C11 . H112 . 1.000       no
C11 . H113 . 1.000       no
C12 . H121 . 1.000       no
C13 . H131 . 1.000       no
C13 . H132 . 1.000       no
C13 . H133 . 1.000       no
C14 . H141 . 1.000       no
C14 . H142 . 1.000       no
C14 . H143 . 1.000       no
loop_ 
 _geom_angle_atom_site_label_1
 _geom_angle_site_symmetry_1
 _geom_angle_atom_site_label_2
 _geom_angle_site_symmetry_2
 _geom_angle_atom_site_label_3
 _geom_angle_site_symmetry_3
 _geom_angle
 _geom_angle_publ_flag
S1 . Cu1 . S2 . 137.32(3)    yes
S1 . Cu1 . N2 . 85.92(7)    yes
S2 . Cu1 . N2 . 112.06(7)    yes
S1 . Cu1 . N4 . 116.39(7)    yes
S2 . Cu1 . N4 . 85.47(7)    yes
N2 . Cu1 . N4 . 125.02(9)    yes
Cu1 . S1 . C1 . 97.67(11)    yes
Cu1 . S2 . C5 . 97.45(11)    yes
F1 . P1 . F2 . 89.03(17)    yes
F1 . P1 . F3 . 91.26(19)    yes
F2 . P1 . F3 . 89.7(2)    yes
F1 . P1 . F4 . 178.05(19)    yes
F2 . P1 . F4 . 91.60(18)    yes
F3 . P1 . F4 . 90.6(2)    yes
F1 . P1 . F5 . 90.52(13)    yes
F2 . P1 . F5 . 179.3(2)    yes
F3 . P1 . F5 . 89.72(15)    yes
F4 . P1 . F5 . 88.86(15)    yes
F1 . P1 . F6 . 88.67(14)    yes
F2 . P1 . F6 . 89.8(2)    yes
F3 . P1 . F6 . 179.50(18)    yes
F4 . P1 . F6 . 89.49(19)    yes
F5 . P1 . F6 . 90.78(17)    yes
N2 . N1 . C1 . 120.7(3)    yes
N2 . N1 . H1 . 122.5(27)    no
C1 . N1 . H1 . 116.9(27)    no
Cu1 . N2 . N1 . 113.29(18)    yes
Cu1 . N2 . C2 . 129.4(2)    yes
N1 . N2 . C2 . 116.5(2)    yes
C1 . N3 . C3 . 123.8(3)    yes
C1 . N3 . H3 . 117.5(29)    no
C3 . N3 . H3 . 118.7(29)    no
Cu1 . N4 . N5 . 113.88(18)    yes
Cu1 . N4 . C6 . 128.5(2)    yes
N5 . N4 . C6 . 116.8(3)    yes
N4 . N5 . C5 . 119.3(3)    yes
N4 . N5 . H5 . 120.7(27)    no
C5 . N5 . H5 . 118.3(27)    no
C5 . N6 . C7 . 124.1(3)    yes
C5 . N6 . H6 . 117.5(25)    no
C7 . N6 . H6 . 118.4(26)    no
C9 . N7 . C10 . 121.6(3)    yes
C9 . N7 . C11 . 121.2(3)    yes
C10 . N7 . C11 . 117.1(3)    yes
C12 . N8 . C13 . 122.1(4)    yes
C12 . N8 . C14 . 119.4(3)    yes
C13 . N8 . C14 . 118.4(3)    yes
S1 . C1 . N1 . 122.4(2)    yes
S1 . C1 . N3 . 122.8(2)    yes
N1 . C1 . N3 . 114.9(3)    yes
N2 . C2 . C2 5_656 116.1(2)    yes
N2 . C2 . C4 . 124.9(3)    yes
C2 5_656 C2 . C4 . 119.0(2)    yes
N3 . C3 . H31 . 109.5       no
N3 . C3 . H32 . 109.5       no
H31 . C3 . H32 . 109.5       no
N3 . C3 . H33 . 109.5       no
H31 . C3 . H33 . 109.5       no
H32 . C3 . H33 . 109.5       no
C2 . C4 . H41 . 109.5       no
C2 . C4 . H42 . 109.5       no
H41 . C4 . H42 . 109.5       no
C2 . C4 . H43 . 109.5       no
H41 . C4 . H43 . 109.5       no
H42 . C4 . H43 . 109.5       no
S2 . C5 . N5 . 122.8(2)    yes
S2 . C5 . N6 . 122.9(2)    yes
N5 . C5 . N6 . 114.3(3)    yes
N4 . C6 . C6 5_656 114.5(2)    yes
N4 . C6 . C8 . 125.5(3)    yes
C6 5_656 C6 . C8 . 119.9(2)    yes
N6 . C7 . H71 . 109.5    no
N6 . C7 . H72 . 109.5    no
H71 . C7 . H72 . 109.5    no
N6 . C7 . H73 . 109.5    no
H71 . C7 . H73 . 109.5    no
H72 . C7 . H73 . 109.5    no
C6 . C8 . H81 . 109.5    no
C6 . C8 . H82 . 109.5    no
H81 . C8 . H82 . 109.5    no
C6 . C8 . H83 . 109.5    no
H81 . C8 . H83 . 109.5    no
H82 . C8 . H83 . 109.5    no
O1 . C9 . N7 . 125.3(3)    yes
O1 . C9 . H91 . 117.3    no
N7 . C9 . H91 . 117.3    no
N7 . C10 . H101 . 109.5    no
N7 . C10 . H102 . 109.5    no
H101 . C10 . H102 . 109.5    no
N7 . C10 . H103 . 109.5    no
H101 . C10 . H103 . 109.5    no
H102 . C10 . H103 . 109.5    no
N7 . C11 . H111 . 109.5    no
N7 . C11 . H112 . 109.5    no
H111 . C11 . H112 . 109.5    no
N7 . C11 . H113 . 109.5    no
H111 . C11 . H113 . 109.5    no
H112 . C11 . H113 . 109.5    no
O2 . C12 . N8 . 125.2(3)    yes
O2 . C12 . H121 . 117.4    no
N8 . C12 . H121 . 117.4    no
N8 . C13 . H131 . 109.5    no
N8 . C13 . H132 . 109.5    no
H131 . C13 . H132 . 109.5    no
N8 . C13 . H133 . 109.5    no
H131 . C13 . H133 . 109.5    no
H132 . C13 . H133 . 109.5    no
N8 . C14 . H141 . 109.5    no
N8 . C14 . H142 . 109.5    no
H141 . C14 . H142 . 109.5    no
N8 . C14 . H143 . 109.5    no
H141 . C14 . H143 . 109.5    no
H142 . C14 . H143 . 109.5    no

#===END
